# Supplementary material for: Au3+-Induced gel network formation of proteins
Source: Royal Society of Chemistry journal article supplement (doi:10.1039/d1sm01031j), 2021-01-01
Supplement: d1sm01031j1.pdf [file d1sm01031j1.pdf]

## Supporting Information

### **Au<sup>3+</sup>-induced gel network formation of proteins**

Laura M. I. Schijven<sup>a,b</sup>, Vittorio Saggiomo<sup>b</sup>, Aldrik H. Velders<sup>b</sup>, Johannes H. Bitter<sup>a</sup> and Constantinos V. Nikiforidis<sup>\*,a</sup>

<sup>a</sup>. Biobased Chemistry and Technology, Wageningen University and Research, Bornse Weilanden 9, 6708 WG Wageningen, The Netherlands. E-mail: costas.nikiforidis@wur.nl

<sup>b</sup>. BioNanoTechnology, Wageningen University and Research, Bornse Weilanden 9, 6708 WG Wageningen, The Netherlands

**S1 Au<sup>3+</sup> reduction by HDL**

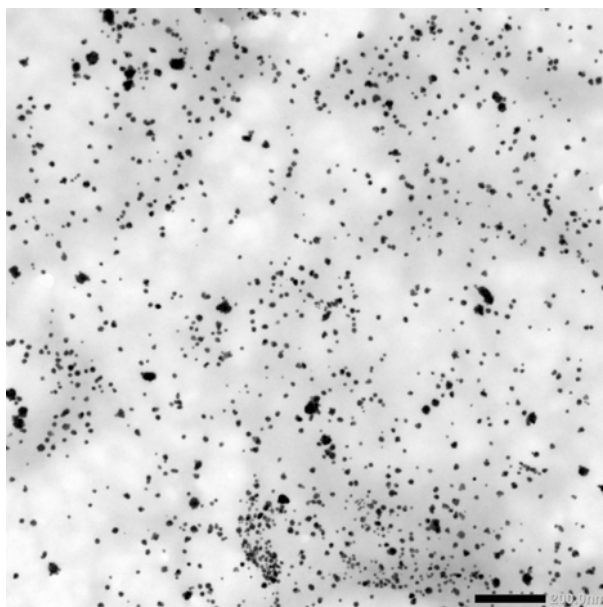

**Fig. S1** TEM image of Au-HDL mixture (0.1% (w/v)) after 3 days of preparation. Scale bar is 200 nm.

## S2 Influence of temperature

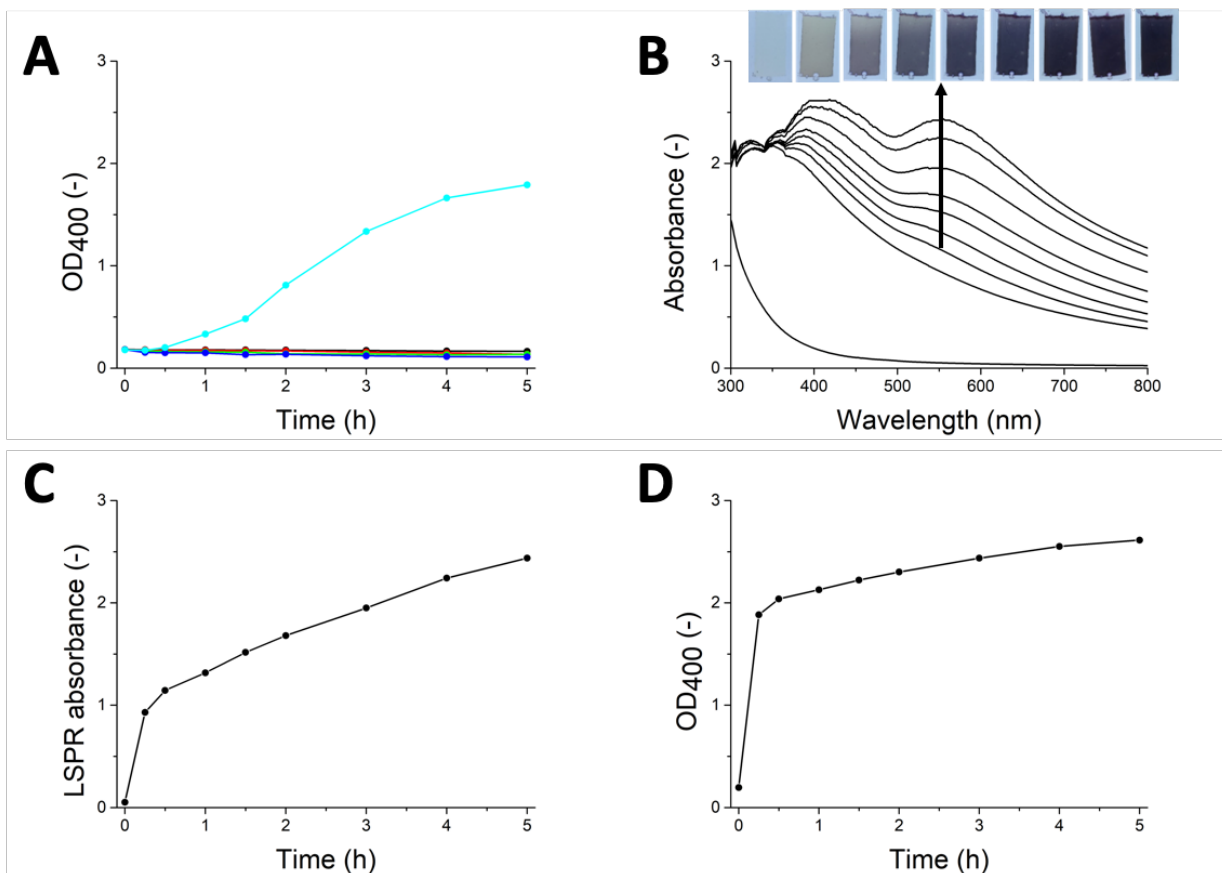

**Fig. S2** (A) Time-dependent  $OD_{400}$  plots of 3.0% (w/v) HDL solutions in 1.71 M NaCl incubated at  $T = 4$  °C (black dotted line), 20 °C (red dotted line), 40 °C (green dotted line), 60 °C (blue dotted line) and 80 °C (cyan dotted line). (B) Solid UV-Vis absorbance and derived (C) LSPR absorbance (at  $\lambda = 555$  nm) and (D)  $OD_{400}$  spectra of Au-HDL mixture incubated at  $T = 80$  °C followed for 5 h (insets) optical photographs showing gradual color change of the Au-HDL mixture at different time intervals.

### S3 FTIR study of Au-HDL interactions

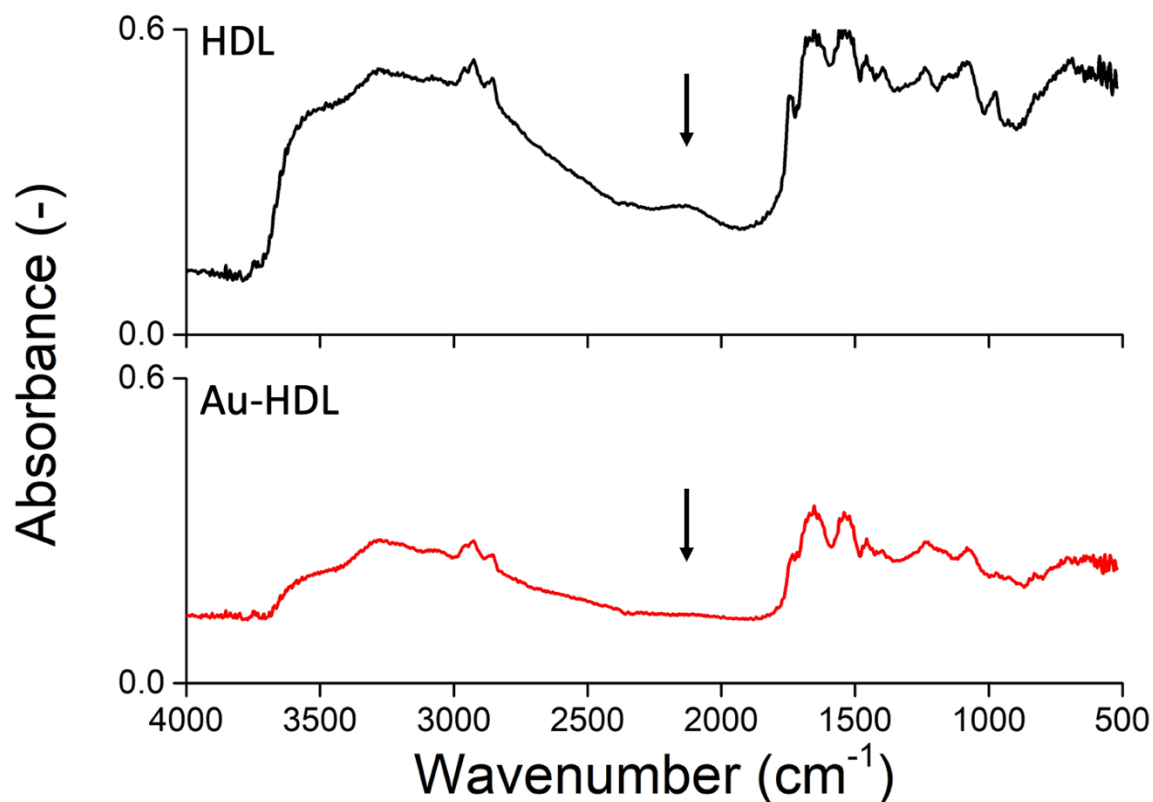

**Fig. S3** FTIR spectra of HDL (top, black graph) and Au-HDL network (bottom, red graph) in the 4000-500 cm<sup>-1</sup> frequency region at ambient conditions. The arrows are pointing at the SH stretching vibrations.

### S4 SDS gel electropherogram of Au-HDL mixtures followed in time

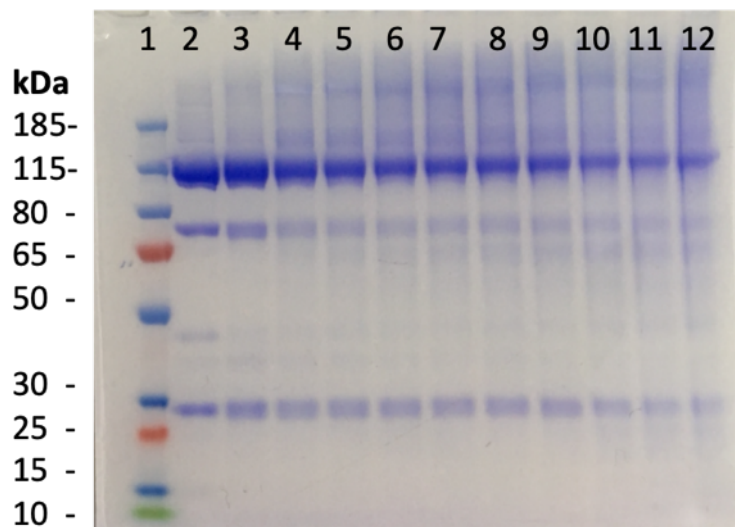

**Fig. S4** SDS gel electropherogram of the protein marker (lane 1), native HDL (lane 2) and Au-HDL mixtures at different time spots (lane 3-12: 0, 10, 20, 30, 40, 50 60, 120, 180 and 240 mins).

## S5 Additional UV-Vis absorbance and fluorescence spectra

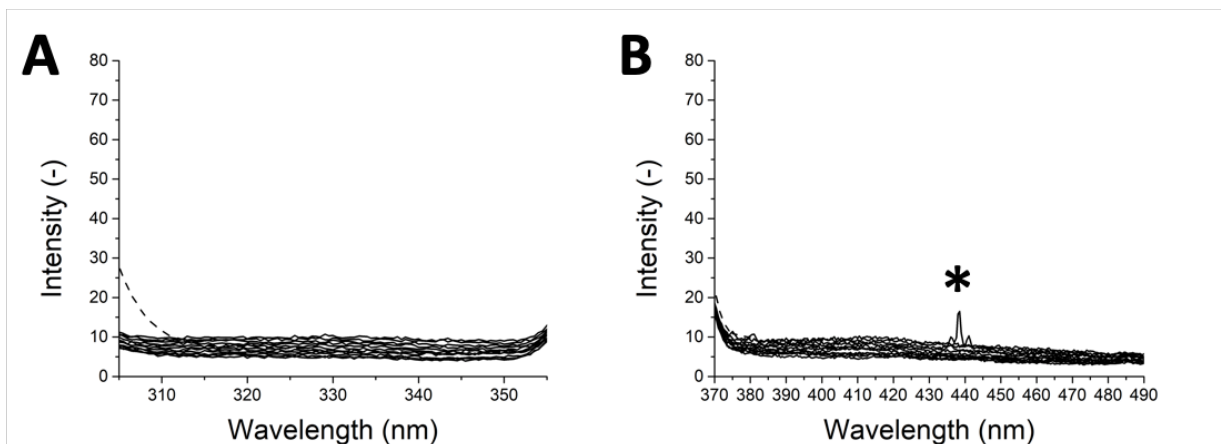

**Fig. S5** Fluorescence (A) excitation ( $\lambda_{em} = 410$  nm) and (B) emission spectra ( $\lambda_{ex} = 325$  nm) of 0.01 % (w/v) HDL (dashed line) and Au-HDL mixture (solid line) in 1.71 M NaCl at different time intervals (0-5 h, every 30 min). The peak marked \* arised from an artefact during measurement.

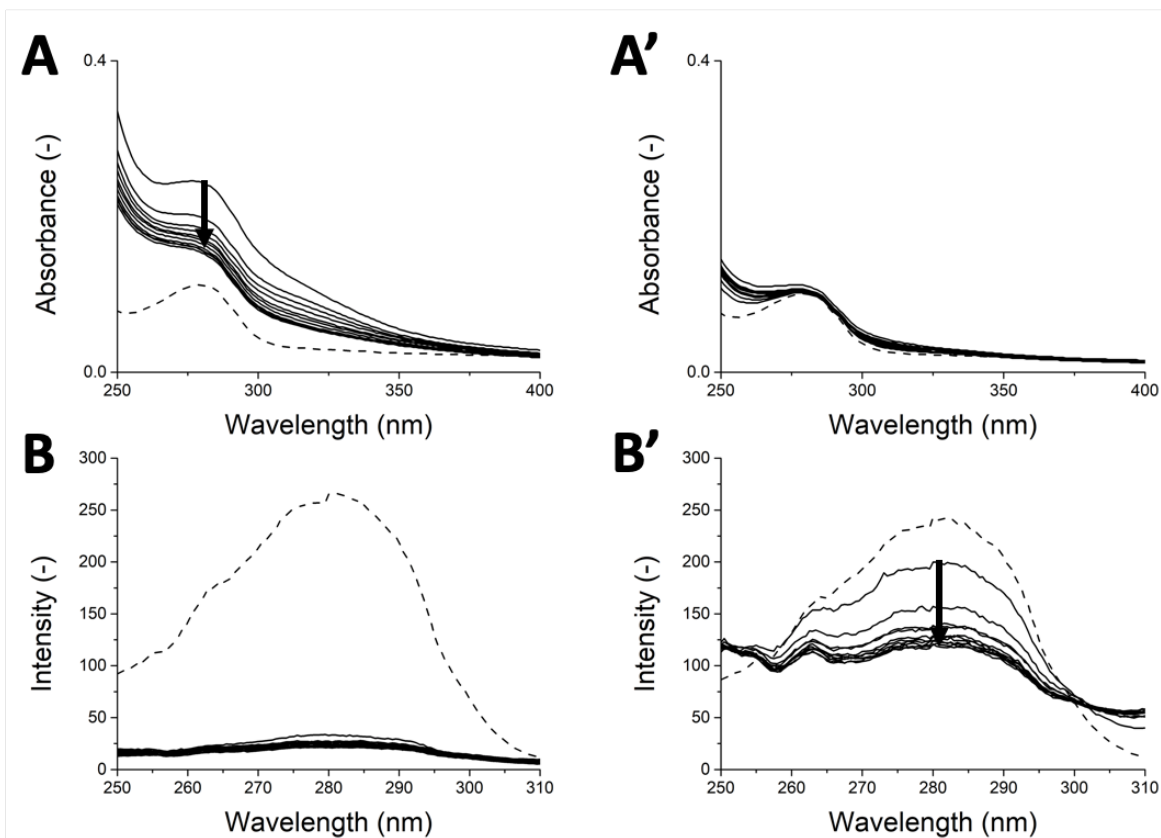

**Fig. S6** (A) UV-Vis absorbance and (B) fluorescence excitation ( $\lambda_{em} = 410$  nm) spectra of 0.01% (w/v) HDL (dashed line) and Au-HDL mixture (solid line) in 1.71 M NaCl before and (A', B') after KCN treatment at different time intervals (0-5 h, every 30 min, indicated by the black arrow).

### S6 Au<sup>3+</sup>-induced gel network and AuNPs formation of BSA and WPI

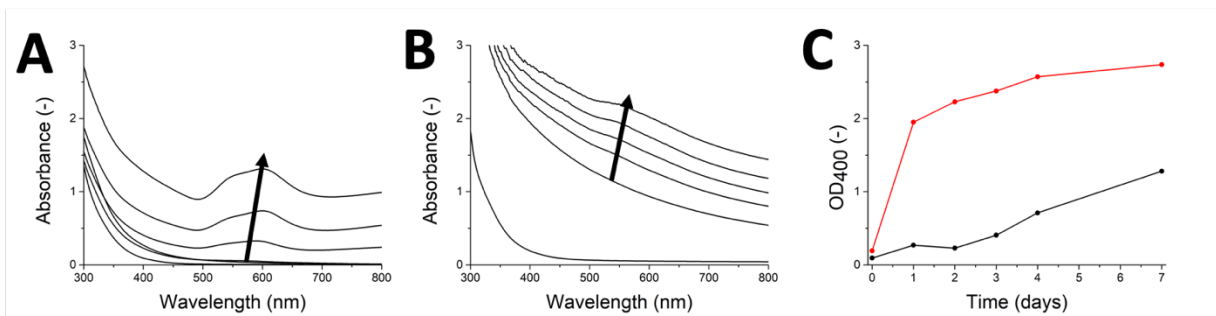

**Fig. S7** Solid UV-Vis absorbance spectra of (A) Au-BSA and (B) Au-WPI mixtures incubated at 20 °C followed in time from 0-7 days. The characteristic LSPR peaks of AuNPs increased in time, indicated by the arrows. (C) Derived OD<sub>400</sub> spectra of BSA (black dotted-line) and WPI (red dotted-line) against time.
